# Supplementary material for: Effect of 5-Azacitine Treatment on Redox Status and Inflammatory Condition in MDS Patients
Source: Preprints.org preprint supplement (doi:10.20944/preprints202112.0137.v1), 2021-12-08
Supplement: Supplementary file 1 [file supplementary]

| **Supplementary Table 1. Clinical features and genetic profile of the 24 MDS patients included in the study** | | | | | | | |
| --- | --- | --- | --- | --- | --- | --- | --- |
| **PATIENTS** | **% BLASTS in BM** | **WHO-2016** | **TIME FROM DIAGNOSIS TO ANALYSIS** | **IPSS-R** | **CYTOGENETIC SCORE** | **MUTATIONAL PROFILE** | **TREATMENT** |
| **1** | 3 | MDS-SLD | 1 month | BR | Good | ***ASXL1*** (37%), *U2AF1* (41.8%), *SETBP1* (2.9%) | Azacitidine |
| **2** | 2 | MDS-SLD | 4 month | VL | Good | ***ASXL1***(44,2%), *U2AF1* (40,85%) | NA |
| **3** | 2 | MDS-RS-SLD | 3 month | BR | Good | *SF3B1* (43,2%), *TET2* (47,2%) | NA |
| **4** | 2 | MDS-MLD | 1 year | INT | Good | ***TP 53***(28,6%),***ASXL1*** (25,4%), *SRSF2* (28,6%), *U2AF1* (30,6%) | Azacitidine |
| **5** | 0 | MDS-MLD | 5 month | VL | Good | ***ASXL1***(18,3%), ***EZH2*** (37,3%), ***RUNX1*** (9,9%),*TET2*(28%**)** | Azacitidine |
| **6** | 1 | MDS-MLD | <1 month | INT | Poor | ***TP53***(76,4%) | NA |
| **7** | 3 | MDS-MLD | 1 year | VL | Good | *IDH2* (46,6%), *DNMT3A* (45%) | NA |
| 1 | 1.5 years | *IDH2* (46.7%), *DNMT3A* (46.5%) | Azacitidine |
| **8** | 2,5 | MDS-MLD | 1 year | VL | Very Good | ND | Supportive care |
| **9** | 3 | MDS-MLD | 2 years | VL | Good | Not detected | NA |
| **10** | 2 | MDS-MLD | 5 month | BR | Good | ***ASXL1*** (12,5%) | Supportive care |
| **11** | 3 | MDS-RS-MLD | 2 year | BR | Good | ND | Supportive care |
| **12** | 4 | MDS-RS-MLD | 2 years | VL | Good | ***RUNX1*** (49.3%), *SF3B1* (28%) | NA |
| **13** | 1 | MDS *del*(5q) | 8 month | INT | Good | Not detected | Supportive care |
| **14** | 3 | MDS *del*(5q) | <1 month | BR | Good | **ASXL1** (47.7%), TET2 (47.3%) | NA |
| **15** | 2 | MDS SA | 1.5 month | BR | Good | ***RUNX1***(18.8%), *SF3B1* (42%), *JAK2* (5.8%), *TET2* (40.9%) | Supportive care |
| **16** | 4 | MDS SA | 1.5 month | INT | Poor | *SF3B1* (40,3%) | NA |
| **17** | 6 | MDS EB-1 | 1 year | AR | Intermediate | ***ASXL1*** (32.5%), *ZRSR2* (67.4%) | Supportive care |
| **18** | 9 | MDS EB-1 | <1 month | INT | Good | ***ASXL1***(11,6%) | Azacitidine |
| **19** | 6 | MDS EB-1 | <1 month | INT | Good | *WT1* (11.8%) | NA |
| 1 |  | 4 month | *WT1* (17.4%) | Azacitidine |
| **20** | 5,5 | MDS EB-1 | <1 month | MAR | Very Poor | ***TP53***(2.9%),***RUNX1***(1.9%) | NA |
| **PATIENTS** | **% BLASTS BM** | **WHO-2016** | **TIME FROM DIAGNOSIS TO ANALYSIS** | **IPSS-R** | **CYTOGENETIC SCORE** | **MUTATIONAL PROFILE** | **TREATMENT** |
| **21** | 18 | MDS EB-2 | <1 month | INT | Good | ***ASXL1*** (31.1%), *FLT3* (9.3%), *SRSF2* (32.8%), *TET2* (33.3%)*, NRAS c.35G>A* (11.8%), *NRAS c34G>A* (5.9%), *ETV6* (2.5%) | NA |
| 0 | 3 month | ***ASXL1***(18%), *FLT3* (1%), *SRSF2* (21.1%), *TET2* (42.7%), *NRAS c.35G>A* (3.9%), *NRAS c34G>A* (1.1%), *ETV6* (3.3%),  *CEBPA* (2.7%), *JAK2* (16.4%), *CBL* (10%) | Chemotherapy |
| **22** | 12 | MDS EB-2 | 2 years | MAR | Intermediate | ***ASXL1***(45,9%),***RUNX1***(48%),***EZH2*** (94,7%), *NRAS* (11,5%), *FLT3* (2%), *CEBPA* (1,7%) | Azacitidine |
| **23** | 18 | MDS EB-2 | <1 month | MAR | Very Poor | ***TP53***(70.5%) | NA |
| **24** | 15 | MDS EB-2 | <1 month | AR | Good | ***ASXL1*** (41.6%),***RUNX1*** (47.3%), ***EZH2***(93.3%), *CSF3R* (45.1%), *CSF3R* (5.9%) | NA |

Note: BM: Bone Marrow; Myelysplastic Syndrome (MDS); MDS with single lineage dysplasia: MDS-SLD; MDS with multilineage dysplasia: MDS-MLD; MDS with ring sideroblasts: MDS-RS; MDS with SLD and ring sideroblasts (MDS-RS-SLD); MDS with MLD and ring sideroblasts (MDS-RS-MLD); MDS with isolated del(5q): MDS (*del*5q); MDS EB-1, -2: MDS with Excess of Blasts-1, -2. IPSS-R: Revised International Prognostic Scoring System; VHR: Very High Risk; HR: High Risk, INT: Intermediate, LR: Low Risk; VL: Very Low Risk.

NA: Not Applicable; ND: No Data.

Mutational Score: number of total somatic mutations detected in each patient.

In Mutational Profile, the Variant Allelic Frequencies (VAFs) are shown in parentheses and genes indicated in bold are High Molecular Risk (HMR) genes [5].
